# Supplementary material for: Phase transitioned nuclear Oskar promotes cell division of Drosophila primordial germ cells
Source: eLife. 2018 Sep 27;7:e37949. doi: 10.7554/eLife.37949 (PMC6191285; doi:10.7554/eLife.37949)
Supplement: Figure 3—source data 1. — Since our data show that the somatic cytoplasm and the intergranular space are largely devoid of Oskar protein (Figure 1B) (Vanzo and Ephrussi, 2002), we assume that the proteins that precipitated with Short Osk most likely interacted with it in germ granules. As a control, we used the results of a parallel experiment where we had identified proteins that co-IPed with the 138 aa N-terminal part of Long Osk, which does not share any protein sequence with Short Osk and localizes to the posterior egg cortex but not to germ granules or nuclear granules (Hurd et al., 2016). Proteins that co-IPed with this control and Short Osk were considered non-specific contaminants. This control also eliminated non-physiological protein interactions that may have resulted from over-expression of tagged Osk proteins (Hurd et al., 2016). Finally, top germ granule interactors were selected by normalizing the enrichment of proteins in the mass spec by the amount of Short Osk (Hurd et al., 2016). This approach identified 119 proteins as highly enriched in the Short Osk IP including all core granule components Vasa, Tud and Aub (Arkov et al., 2006; Voronina et al., 2011) as well as other known granule interactors, Piwi, DCP1 and Cup (Voronina et al., 2011) (Figure 3—source data 1) and 113 novel germ granule constituents (Arkov et al., 2006; Gao and Arkov, 2013; Thomson et al., 2008; Voronina et al., 2011). [file elife-37949-fig3-data1.xlsx]

## Sheet: Top Short Interactors
Description	CG	Flybasde ID
Top hits EITHER unique to short OR enriched in short but not present in N-term
ATP-dependent RNA helicase vasa, isoform A OS=Drosophila melanogaster GN=vas PE=1 SV=3 - [VASA1_DROME]	CG43081	FBgn0283442
CG5726 OS=Drosophila melanogaster GN=CG5726 PE=2 SV=1 - [Q7JRH5_DROME]	CG5726	FBgn0034313
Decapping protein 1, isoform A OS=Drosophila melanogaster GN=Dcp1 PE=1 SV=1 - [Q9W1H5_DROME]	CG11183	FBgn0034921
CG30122, isoform B OS=Drosophila melanogaster GN=CG30122 PE=4 SV=1 - [A1ZBB4_DROME]	CG30122	FBgn0050122
E3 ubiquitin-protein ligase hyd OS=Drosophila melanogaster GN=hyd PE=1 SV=3 - [HYD_DROME]	CG9484	FBgn0002431
Isoform C of La-related protein 1 OS=Drosophila melanogaster GN=larp - [LARP_DROME]	CG42551	FBgn0261618
Maternal protein tudor OS=Drosophila melanogaster GN=tud PE=1 SV=2 - [TUD_DROME]	CG9450	FBgn0003891
Longitudinals lacking protein, isoform G OS=Drosophila melanogaster GN=lola PE=1 SV=2 - [LOLA1_DROME]	CG12052	FBgn0005630
LD40489p OS=Drosophila melanogaster GN=SF2 PE=2 SV=1 - [Q9V3W7_DROME]	CG6987	FBgn0283477
Kinesin heavy chain OS=Drosophila melanogaster GN=Khc PE=1 SV=2 - [KINH_DROME]	CG7765	FBgn0001308
FI21269p1 OS=Drosophila melanogaster GN=muskelin PE=2 SV=1 - [Q0E9A5_DROME]	CG8811	FBgn0033757
Isoform C of Zinc finger protein on ecdysone puffs OS=Drosophila melanogaster GN=Pep - [PEP_DROME]	CG6143	FBgn0004401
Enhancer of mRNA-decapping protein 3 OS=Drosophila melanogaster GN=Edc3 PE=1 SV=1 - [EDC3_DROME]	CG6311	FBgn0036735
Protein bicaudal C OS=Drosophila melanogaster GN=BicC PE=1 SV=2 - [BICC_DROME]	CG4824	FBgn0000182
CG6701 OS=Drosophila melanogaster GN=CG6701 PE=4 SV=1 - [A1Z9K0_DROME]	CG6701	FBgn0033889
Isoform C of Protein aubergine OS=Drosophila melanogaster GN=aub - [AUB_DROME]	CG6137	FBgn0000146
BcDNA.GH11110 OS=Drosophila melanogaster GN=nito PE=2 SV=1 - [Q7KMJ6_DROME]: Spenito	CG2910	FBgn0027548
Probable histone-binding protein Caf1 OS=Drosophila melanogaster GN=Caf1 PE=1 SV=1 - [CAF1_DROME]	CG4236	FBgn0263979
Isoform C of Ran-binding proteins 9/10 homolog OS=Drosophila melanogaster GN=RanBPM - [RBP9X_DROME]	CG42236	FBgn0262114
Not1, isoform E OS=Drosophila melanogaster GN=Not1 PE=4 SV=1 - [A8DY82_DROME]	CG34407	FBgn0085436
Cdc16 OS=Drosophila melanogaster GN=Cdc16 PE=4 SV=1 - [Q9VCN6_DROME]	CG6759	FBgn0025781
RuvB-like helicase 1 OS=Drosophila melanogaster GN=pont PE=1 SV=1 - [RUVB1_DROME]	CG4003	FBgn0040078
40S ribosomal protein S14 OS=Drosophila melanogaster GN=RpS14a PE=1 SV=1 - [RS14_DROME]	CG1524	FBgn0004403
HnRNP K protein homolog OS=Drosophila melanogaster GN=bl PE=2 SV=3 - [Q9V948_DROME]	CG13425	FBgn0267791
Alanine--tRNA ligase, cytoplasmic OS=Drosophila melanogaster GN=Aats-ala PE=2 SV=1 - [SYAC_DROME]	CG13391	FBgn0027094
Wispy, isoform B OS=Drosophila melanogaster GN=wisp PE=4 SV=1 - [X2JEK3_DROME]	CG15737	FBgn0260780
DNA replication licensing factor MCM4 OS=Drosophila melanogaster GN=dpa PE=1 SV=2 - [MCM4_DROME]	CG1616	FBgn0015929
CG34126, isoform D OS=Drosophila melanogaster GN=CG34126 PE=4 SV=1 - [M9PC65_DROME]	CG34126	FBgn0083962
LD05471p (Fragment) OS=Drosophila melanogaster GN=SMC2 PE=2 SV=2 - [Q8T0F9_DROME]	CG10212	FBgn0027783
AT04516p OS=Drosophila melanogaster GN=Drp1 PE=2 SV=1 - [Q8IHG0_DROME]	CG3210	FBgn0026479
40S ribosomal protein S7 OS=Drosophila melanogaster GN=RpS7 PE=1 SV=1 - [RS7_DROME]	CG1883	FBgn0039757
FI21236p1 OS=Drosophila melanogaster GN=rump PE=2 SV=1 - [Q9VHC7_DROME]	CG9373	FBgn0267790
LD43460p OS=Drosophila melanogaster GN=Trap1 PE=2 SV=1 - [Q8MSU6_DROME]	CG3152	FBgn0026761
RNA-binding protein lark OS=Drosophila melanogaster GN=lark PE=1 SV=1 - [LARK_DROME]	CG8597	FBgn0011640
Minichromosome maintenance 3, isoform B OS=Drosophila melanogaster GN=Mcm3 PE=4 SV=1 - [X2JAI4_DROME]	CG4206	FBgn0024332
Isoform A of Protein groucho OS=Drosophila melanogaster GN=gro - [GROU_DROME]	CG8384	FBgn0001139
Protein ELYS homolog OS=Drosophila melanogaster GN=CG14215 PE=1 SV=2 - [ELYS_DROME]	CG14215	FBgn0031052
CG5214 OS=Drosophila melanogaster GN=CG5214 PE=2 SV=1 - [Q9VGQ1_DROME]	CG5214	FBgn0037891
Inositol-3-phosphate synthase OS=Drosophila melanogaster GN=Inos PE=1 SV=1 - [INO1_DROME]	CG11143	FBgn0025885
Dolichyl-diphosphooligosaccharide--protein glycosyltransferase 48 kDa subunit OS=Drosophila melanogaster GN=Ost48 PE=2 SV=2 - [OST48_DROME]	CG9022	FBgn0014868
CG7878 OS=Drosophila melanogaster GN=CG7878 PE=2 SV=1 - [Q7K4L8_DROME]	CG7878	FBgn0037549
Isoform F of Protein gustavus OS=Drosophila melanogaster GN=gus - [GUS_DROME]	CG2944	FBgn0026238
NAT1, isoform C (Fragment) OS=Drosophila melanogaster GN=NAT1 PE=2 SV=1 - [Q5KTT4_DROME]	CG3845	FBgn0010488
Protein clueless OS=Drosophila melanogaster GN=clu PE=1 SV=1 - [CLU_DROME]	CG8443	FBgn0034087
CG2246, isoform D OS=Drosophila melanogaster GN=CG2246 PE=2 SV=1 - [Q961V3_DROME]	CG2246	FBgn0039790
Signal recognition particle subunit SRP68 OS=Drosophila melanogaster GN=Srp68 PE=2 SV=1 - [SRP68_DROME]	CG5064	FBgn0035947
BIR-containing ubiquitin-conjugating enzyme OS=Drosophila melanogaster GN=Bruce PE=2 SV=3 - [Q9VH01_DROME]	CG6303	FBgn0266717
Phosphoribosylformylglycinamidine synthase OS=Drosophila melanogaster GN=ade2 PE=1 SV=2 - [PUR4_DROME]	CG9127	FBgn0000052
40S ribosomal protein S16 OS=Drosophila melanogaster GN=RpS16 PE=1 SV=1 - [RS16_DROME]	CG4046	FBgn0034743
39 kDa FK506-binding nuclear protein OS=Drosophila melanogaster GN=FK506-bp1 PE=1 SV=2 - [FKB39_DROME]	CG6226	FBgn0013269
Interleukin enhancer-binding factor 2 homolog OS=Drosophila melanogaster GN=CG5641 PE=2 SV=1 - [ILF2_DROME]	CG5641	FBgn0038046
LD20554p OS=Drosophila melanogaster GN=CG18861 PE=2 SV=1 - [Q8T094_DROME]	CG18861	FBgn0042178
Mitochondrial ribosomal protein S5, isoform A OS=Drosophila melanogaster GN=mRpS5 PE=2 SV=1 - [Q8SYP9_DROME]	CG40049	FBgn0044510
DNA replication licensing factor Mcm5 OS=Drosophila melanogaster GN=Mcm5 PE=1 SV=1 - [MCM5_DROME]	CG4082	FBgn0017577
LP05220p OS=Drosophila melanogaster GN=Sec24CD PE=2 SV=2 - [Q9VQ94_DROME]	CG10882	FBgn0262126
Protein piwi OS=Drosophila melanogaster GN=piwi PE=1 SV=1 - [PIWI_DROME]	CG6122	FBgn0004872
Sec13 OS=Drosophila melanogaster GN=Sec13 PE=4 SV=1 - [Q9V3J4_DROME]	CG6773	FBgn0024509
CENTROSOME ORGANISATION Isoform B3 of 205 kDa microtubule-associated protein OS=Drosophila melanogaster GN=Map205 - [MA205_DROME]	CG1483	FBgn0002645
GH07821p OS=Drosophila melanogaster GN=mRpS22 PE=2 SV=1 - [Q9VAY9_DROME]	CG12261	FBgn0039555
Nucleoprotein TPR OS=Drosophila melanogaster GN=Mtor PE=1 SV=1 - [TPR_DROME]	CG8274	FBgn0013756
Phosphoglycerate mutase 5, isoform B OS=Drosophila melanogaster GN=Pgam5 PE=4 SV=1 - [X2JC94_DROME]	CG14816	FBgn0023517
tRNA-splicing ligase RtcB homolog OS=Drosophila melanogaster GN=CG9987 PE=1 SV=1 - [RTCB_DROME]	CG9987	FBgn0032781
LD39177p OS=Drosophila melanogaster GN=APC7 PE=2 SV=1 - [Q8T020_DROME]	CG14444	FBgn0029879
Asparaginyl-tRNA synthetase, isoform A OS=Drosophila melanogaster GN=Aats-asn PE=2 SV=1 - [Q9V434_DROME]	CG10687	FBgn0086443
CG31739, isoform A OS=Drosophila melanogaster GN=mdy PE=2 SV=3 - [Q9VJH2_DROME]	CG31991	FBgn0004797
Sc2 OS=Drosophila melanogaster GN=Sc2 PE=4 SV=1 - [Q9VZL3_DROME]	CG10849	FBgn0035471
DNA damage-binding protein 1 OS=Drosophila melanogaster GN=pic PE=1 SV=1 - [DDB1_DROME]	CG7769	FBgn0260962
Eukaryotic translation initiation factor 2 subunit 1 OS=Drosophila melanogaster GN=eIF-2alpha PE=2 SV=1 - [IF2A_DROME]CG9946	CG9946	FBgn0261609
BcDNA.LD34343 OS=Drosophila melanogaster GN=wdb PE=2 SV=2 - [Q9VB23_DROME]	CG5643	FBgn0027492
LD44970p OS=Drosophila melanogaster GN=Sucb PE=2 SV=1 - [Q9V470_DROME]	CG10622	FBgn0029118
NAT1 ortholog, isoform A OS=Drosophila melanogaster GN=Nat1 PE=2 SV=1 - [Q9VWI2_DROME]	CG3845	FBgn0010488
RE14391p OS=Drosophila melanogaster GN=Sec63 PE=2 SV=1 - [Q9VS57_DROME]	CG8583	FBgn0035771
FI21104p1 OS=Drosophila melanogaster GN=lds-RA PE=2 SV=1 - [M9WDW1_DROME]	CG2684	FBgn0002542
Isoform E of Heterogeneous nuclear ribonucleoprotein A1 OS=Drosophila melanogaster GN=Hrb98DE - [ROA1_DROME]	CG9983	FBgn0001215
Protein PTCD3 homolog, mitochondrial OS=Drosophila melanogaster GN=CG4679 PE=2 SV=1 - [PTCD3_DROME]	CG4679	FBgn0033816
Ubiquitin-specific protease 7, isoform C OS=Drosophila melanogaster GN=Usp7 PE=4 SV=1 - [X2JEX7_DROME]	CG1490	FBgn0030366
Sec31, isoform A OS=Drosophila melanogaster GN=Sec31 PE=4 SV=1 - [A1Z7J7_DROME]	CG8266	FBgn0033339
LP02262p OS=Drosophila melanogaster GN=l(1)G0255 PE=2 SV=1 - [Q8IRQ5_DROME]	CG4094	FBgn0028336
CG6554-PA OS=Drosophila melanogaster GN=CG6554 PE=4 SV=1 - [C0MJ37_DROME]	CG6554	FBgn0037834
26S proteasome regulatory complex subunit p37A OS=Drosophila melanogaster GN=Uch-L5 PE=2 SV=1 - [Q9XZ61_DROME]	CG3431	FBgn0011327
CG31357 OS=Drosophila melanogaster GN=CG13638 PE=2 SV=1 - [Q8MSB1_DROME]	CG31357	FBgn0051357
Otefin OS=Drosophila melanogaster GN=Ote PE=1 SV=2 - [OTE_DROME]	CG5581	FBgn0266420
26S proteasome regulatory complex subunit p30 OS=Drosophila melanogaster GN=Rpn12 PE=2 SV=1 - [Q9V436_DROME]	CG4157	FBgn0028693
Regulator of nonsense transcripts 1 homolog OS=Drosophila melanogaster GN=Upf1 PE=1 SV=2 - [RENT1_DROME]	CG1559	FBgn0030354
CG6512, isoform A OS=Drosophila melanogaster GN=CG6512 PE=2 SV=1 - [Q8T4G5_DROME]	CG6512	FBgn0036702
RE07060p OS=Drosophila melanogaster PE=2 SV=1 - [Q4QQC1_DROME]	CG12702	FBgn0031070
60S ribosomal protein L31 OS=Drosophila melanogaster GN=RpL31 PE=1 SV=1 - [RL31_DROME]	CG1821	FBgn0025286
Nipped-A, isoform D OS=Drosophila melanogaster GN=Nipped-A PE=4 SV=1 - [A8DY44_DROME]	CG33554	FBgn0053554
CG8771 OS=Drosophila melanogaster GN=CG8771 PE=4 SV=1 - [A1Z945_DROME]	CG8771	FBgn0033766
Probable cysteine desulfurase, mitochondrial OS=Drosophila melanogaster GN=CG12264 PE=2 SV=1 - [NFS1_DROME]	CG12264	FBgn0032393
CG10932, isoform A OS=Drosophila melanogaster GN=CG10932 PE=2 SV=1 - [Q9W3N9_DROME]	CG10932	FBgn0029969
Nucleoporin 205kD, isoform A OS=Drosophila melanogaster GN=Nup205 PE=4 SV=2 - [Q9VWB8_DROME]	CG11943	FBgn0031078
Bifunctional lysine-specific demethylase and histidyl-hydroxylase NO66 OS=Drosophila melanogaster GN=CG2982 PE=1 SV=1 - [NO66_DROME]	CG2982	FBgn0266570
Isoform 3 of Probable ubiquitin carboxyl-terminal hydrolase FAF OS=Drosophila melanogaster GN=faf - [FAF_DROME]	CG1945	FBgn0005632
CG1091, isoform A OS=Drosophila melanogaster GN=CG1091 PE=4 SV=1 - [Q86BP3_DROME]	CG1091	FBgn0037470
Succinate dehydrogenase [ubiquinone] flavoprotein subunit, mitochondrial OS=Drosophila melanogaster GN=SdhA PE=2 SV=3 - [SDHA_DROME]	CG17246	FBgn0261439
LD07775p OS=Drosophila melanogaster GN=smt3 PE=1 SV=1 - [O97102_DROME]	CG4494	FBgn0264922
Nuclear migration protein NudC OS=Drosophila melanogaster GN=nudC PE=2 SV=2 - [Q9VVA6_DROME]	CG9710	FBgn0021768
CG8507 OS=Drosophila melanogaster GN=CG8507 PE=2 SV=1 - [Q9VH64_DROME]	CG8507	FBgn0037756
Protein krasavietz OS=Drosophila melanogaster GN=kra PE=1 SV=1 - [PKRA_DROME]	CG2922	FBgn0250753
IP16365p (Fragment) OS=Drosophila melanogaster GN=Dhc64C PE=2 SV=1 - [Q1EBX0_DROME]	CG7507	FBgn0261797
CG11999 OS=Drosophila melanogaster GN=CG11999 PE=2 SV=1 - [Q9VNA3_DROME]	CG11999	FBgn0037312
Valyl-tRNA synthetase, isoform A OS=Drosophila melanogaster GN=Aats-val PE=3 SV=1 - [Q0E993_DROME]	CG4062	FBgn0027079
DNA mismatch repair protein spellchecker 1 OS=Drosophila melanogaster GN=spel1 PE=3 SV=4 - [MSH2_DROME]	CG4215	FBgn0015546
RE17611p OS=Drosophila melanogaster GN=RpL26 PE=1 SV=1 - [Q9VVU2_DROME]	CG6846	FBgn0036825
CG12140 OS=Drosophila melanogaster GN=Etf-QO PE=2 SV=1 - [Q7JWF1_DROME]	CG12140	FBgn0033465
LD06441p OS=Drosophila melanogaster GN=mRpS35 PE=2 SV=1 - [Q9VZX6_DROME]	CG2101	FBgn0035374
Protein rigor mortis OS=Drosophila melanogaster GN=rig PE=1 SV=1 - [RIG_DROME]	CG30149	FBgn0250850
CG7208, isoform B OS=Drosophila melanogaster GN=CG7208 PE=2 SV=2 - [Q7KSE0_DROME]	CG7208	FBgn0038575
LP04448p OS=Drosophila melanogaster GN=msps PE=1 SV=3 - [Q9VEZ3_DROME]	CG5000	FBgn0027948
Dynein light intermediate chain, isoform A OS=Drosophila melanogaster GN=Dlic PE=2 SV=2 - [Q9VZ20_DROME]	CG1938	FBgn0030276
Proteasome-associated protein ECM29 homolog OS=Drosophila melanogaster GN=CG8858 PE=1 SV=1 - [ECM29_DROME]	CG8858	FBgn0033698
Subito (Fragment) OS=Drosophila melanogaster GN=sub PE=3 SV=1 - [B6UYB4_DROME]	CG12298	FBgn0003545
EG:BACR25B3.9 protein OS=Drosophila melanogaster GN=Klp3A PE=2 SV=1 - [Q9XZ29_DROME]	CG8590	FBgn0011606
Golgi complex-localized glycoprotein 1, isoform A OS=Drosophila melanogaster GN=Glg1 PE=2 SV=2 - [Q9VP27_DROME]	CG33214	FBgn0264561
MIP08013p1 OS=Drosophila melanogaster GN=Mpcp PE=2 SV=1 - [Q0E8E8_DROME]	CG4994	FBgn0026409
GH13542p OS=Drosophila melanogaster GN=vap PE=2 SV=2 - [Q8IR23_DROME]	CG9209	FBgn0003969
GM14238p OS=Drosophila melanogaster GN=Nop56 PE=2 SV=1 - [Q961E2_DROME]	CG13849	FBgn0038964
CG5028, isoform C OS=Drosophila melanogaster GN=CG5028-RC PE=2 SV=1 - [A8JRB8_DROME]	CG5028	FBgn0039358
