# Supplementary material for: Phase transitioned nuclear Oskar promotes cell division of Drosophila primordial germ cells
Source: eLife journal article supplement (doi:10.7554/elife.37949), 2018-09-27
Supplement: supp [file elife-37949-supp-v1.zip]

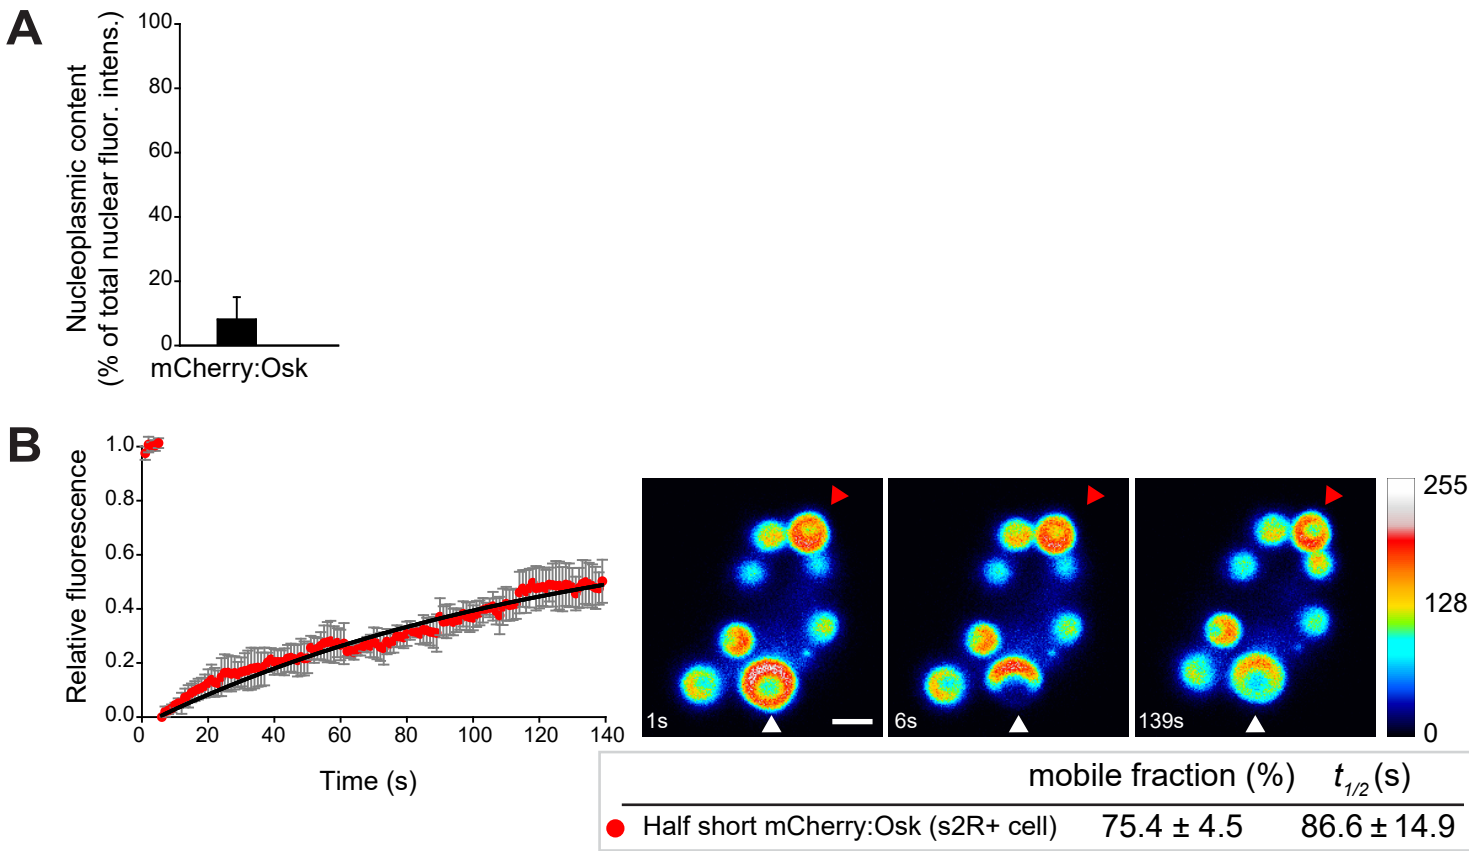

C

| Protein | Granule                | Organism                     | Mobile fract. (%)      | t <sub>1/2</sub> (s) | Reference                                                  |
|---------|------------------------|------------------------------|------------------------|----------------------|------------------------------------------------------------|
| PGL-1   | P granule              | <i>C.elegans</i>             | 68.8                   | 6.9                  | Brangwynne, C.P., et. al., (2009). Science 324, 1729-1732. |
| GLH-1   |                        |                              | 100.0                  | 26.6                 |                                                            |
| PIE-1   |                        |                              | 51.0                   | 7.8                  |                                                            |
| CAR-1   |                        |                              | 16.0                   | 3.8                  |                                                            |
|         |                        |                              |                        |                      |                                                            |
| TIA-1   | Stress granule         | COS cells                    | 99.0                   | 5.0                  | Anderson, P. (2000). J Cell Biol 151, 1257-1268.           |
| PABP-1  |                        |                              | 61.0                   | 5.0                  |                                                            |
|         |                        |                              |                        |                      |                                                            |
| LSm6    | P body                 | HeLa cells                   | 73.0                   | 25.0                 | Andrei, M.A., et al., (2005). RNA 11, 717-727.             |
| eIF4E   |                        |                              | 89.0                   | 60.0                 |                                                            |
| eIF4E-T |                        |                              | 45.0                   | 46.0                 |                                                            |
|         |                        |                              |                        |                      |                                                            |
| Dcp1a   | P body                 | U2OS cells                   | 86.0                   | 6.0                  | Aizer, A., et. al., (2008). Mol Biol Cell 19, 4154-4166.   |
| Dcp1b   |                        |                              | 67.0                   | 11.0                 |                                                            |
| Dcp2    |                        |                              | 0                      | /                    |                                                            |
|         |                        |                              |                        |                      |                                                            |
| Xvelo   | Balbiani body          | <i>Xenopus</i> oocyte        | ~ 20 % recovery in 1 h |                      | Boke, E. et. al., (2016). Cell 166, 637-650                |
| Buck    |                        |                              | ~ 20 % recovery in 1 h |                      |                                                            |
|         |                        |                              |                        |                      |                                                            |
| PGL-1   | P granule              | <i>C.elegans</i>             | 86.3                   | 4.3                  | This study                                                 |
| Osk     | Cytoplasmic germ gran. | <i>Drosophila</i> embryo     | 43.6                   | 6.9                  |                                                            |
| Vasa    |                        |                              | 46.0                   | 23.9                 |                                                            |
| Osk     | Nuclear germ gran.     | <i>Drosophila</i> embryo     | 38.8                   | 13.9                 |                                                            |
| Vasa    |                        |                              | 51.1                   | 8.7                  |                                                            |
| Osk     | Nuclear germ gran.     | <i>Drosophila</i> S2R+ cells | 46.8                   | 10.2                 |                                                            |

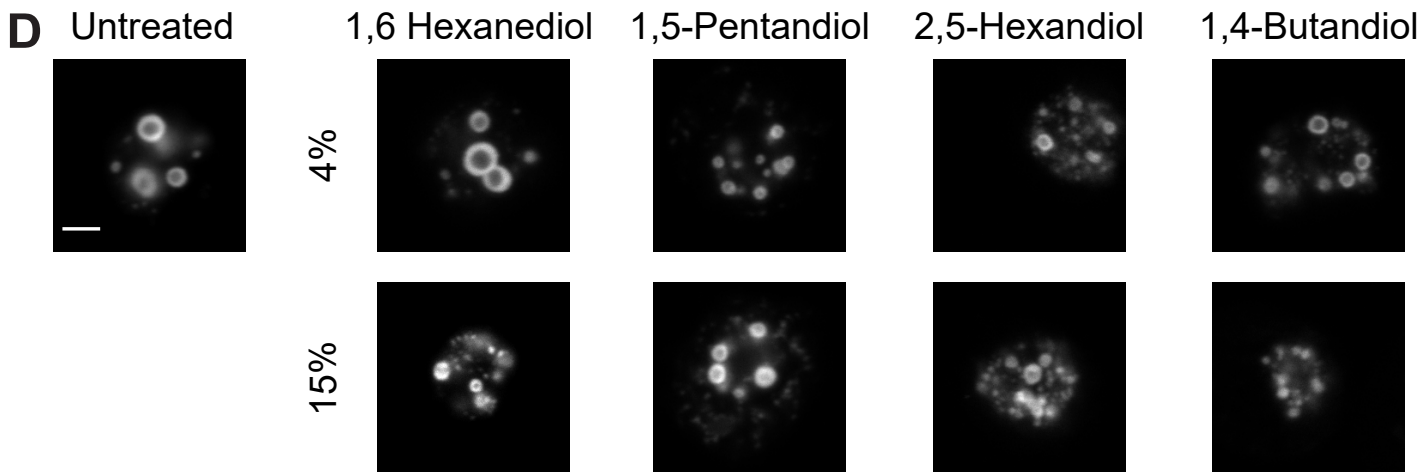

**Figure 4 - figure supplement 1**
