# Supplementary figures and images for: Phase transitioned nuclear Oskar promotes cell division of Drosophila primordial germ cells
Source: eLife journal article supplement (doi:10.7554/elife.37949), 2018-09-27

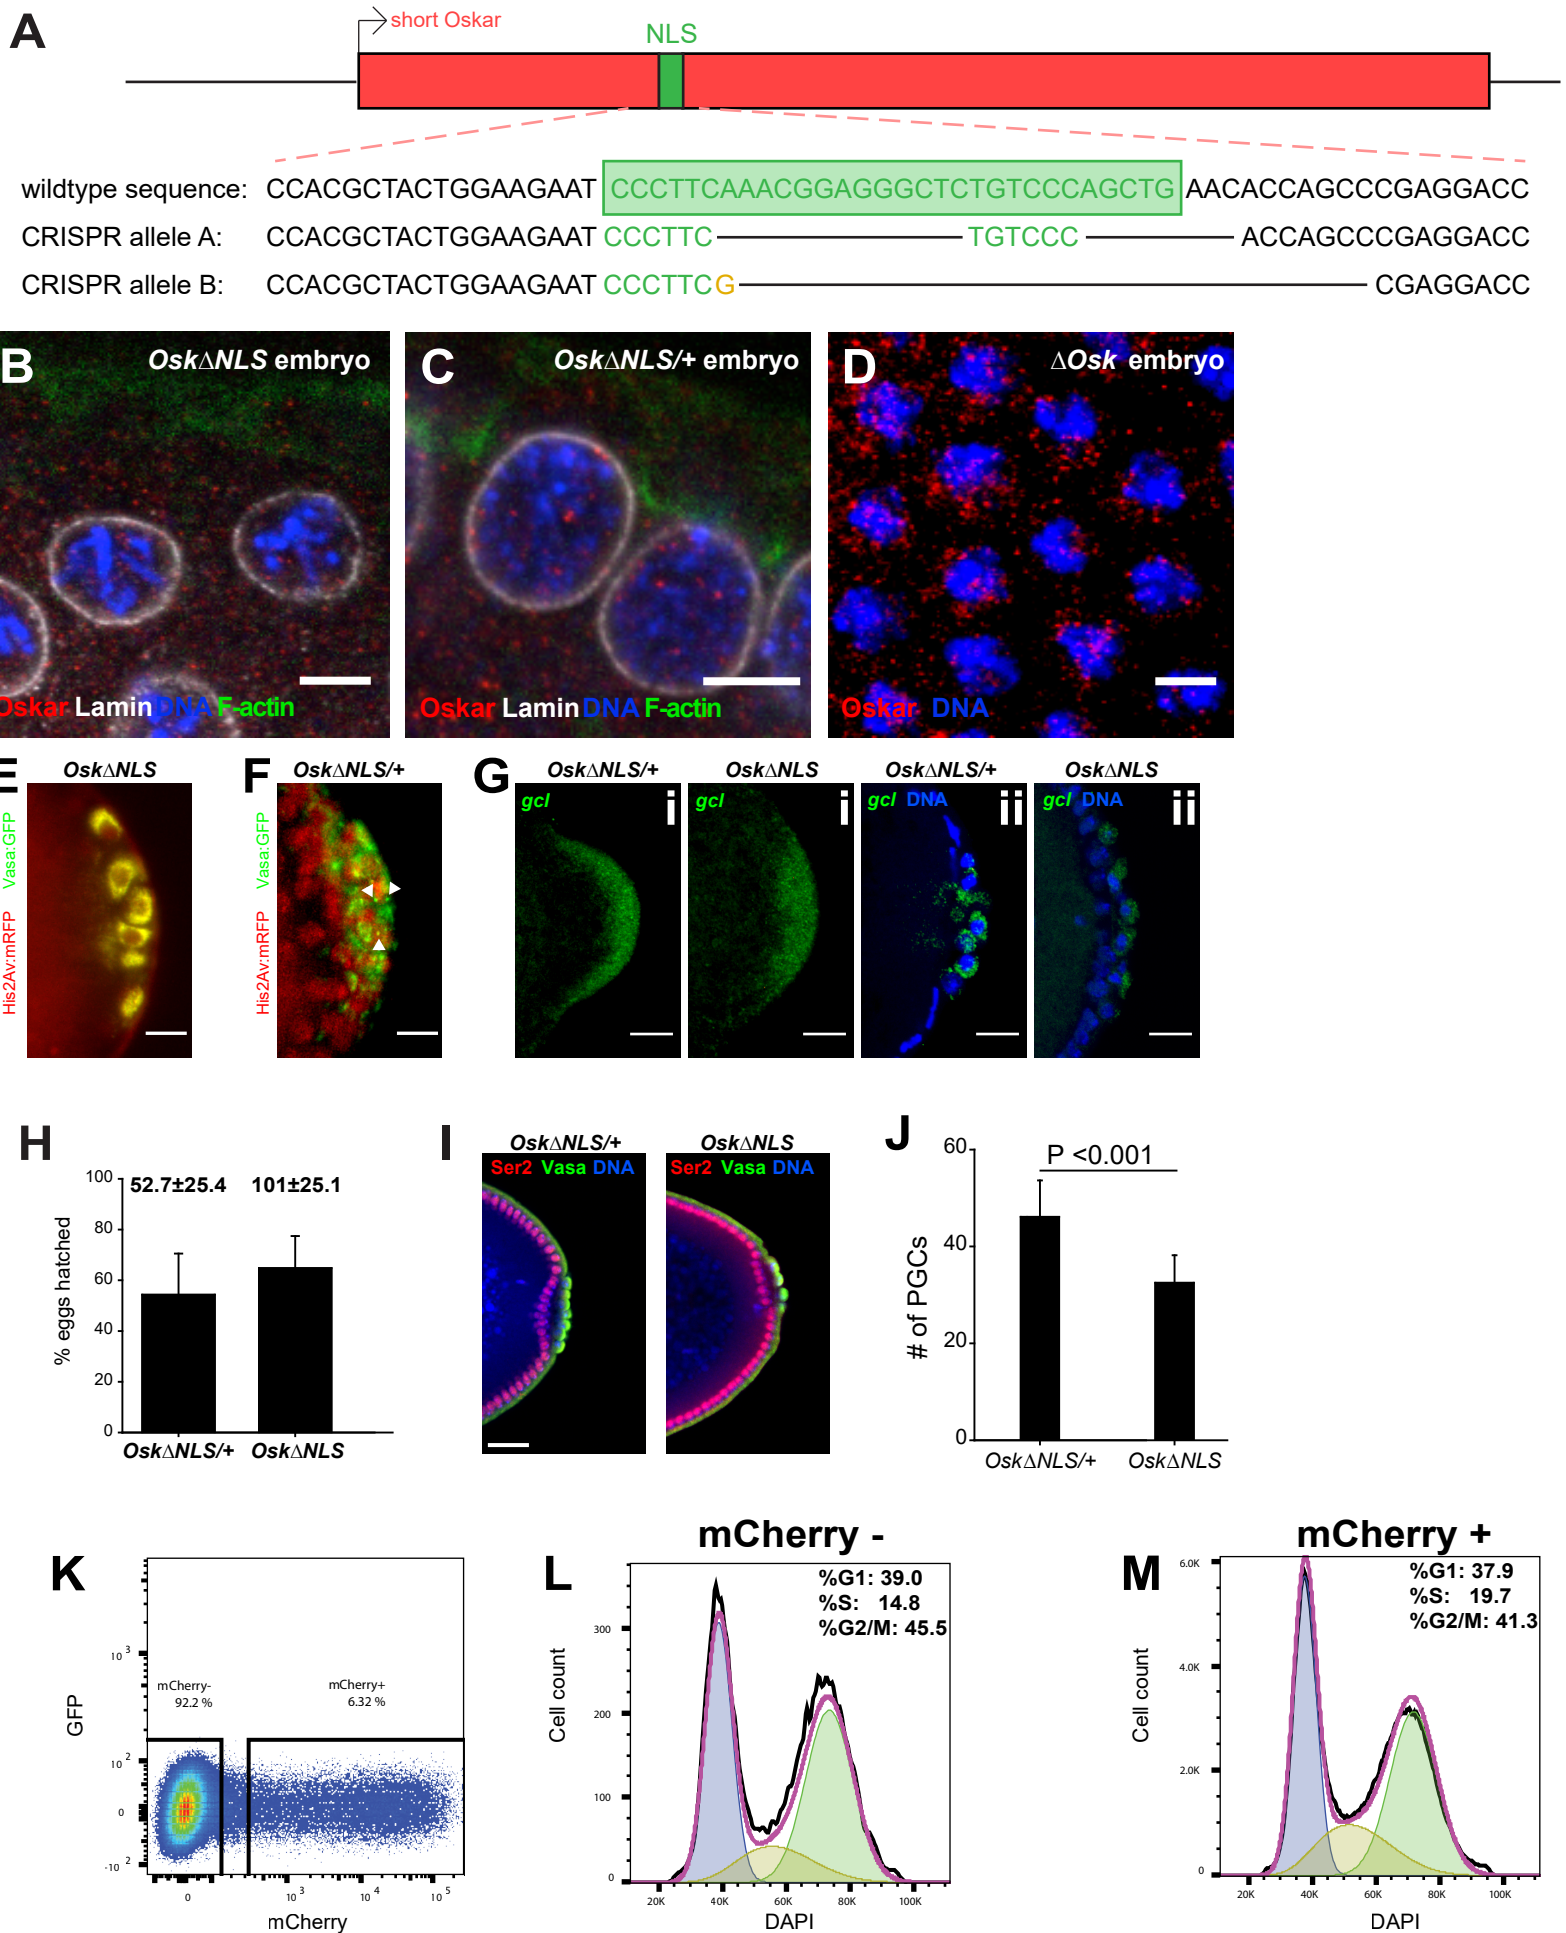

Figure 7 - figure supplement 1

Supplement: supp [file elife-37949-supp-v1.zip]

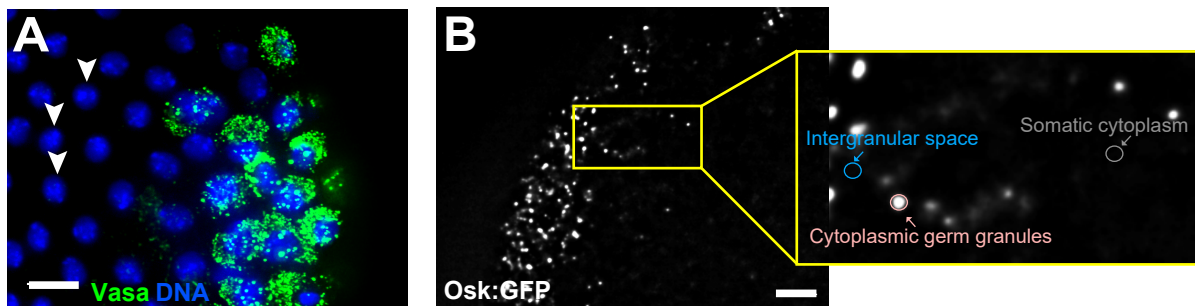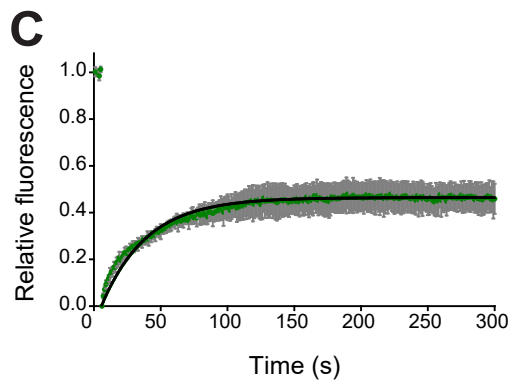

|            | mobile fraction (%) | $t_{1/2}$ (s)  |
|------------|---------------------|----------------|
| ● Vasa:GFP | $46.0 \pm 0.1$      | $23.9 \pm 0.7$ |

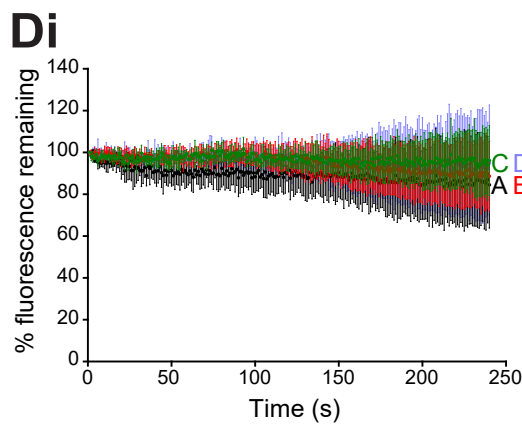

**Dii**

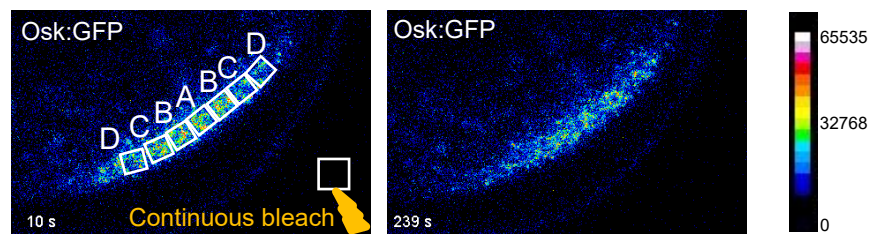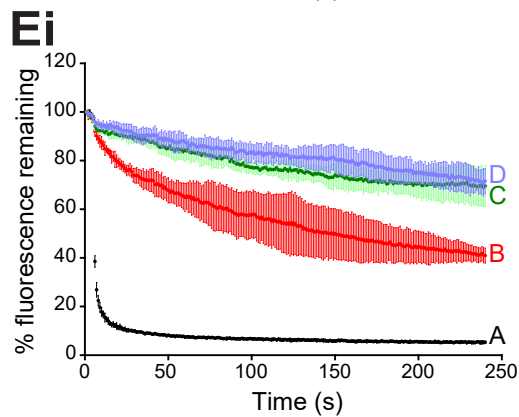

**Eii**

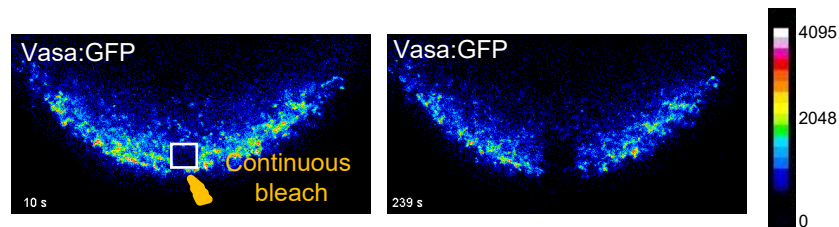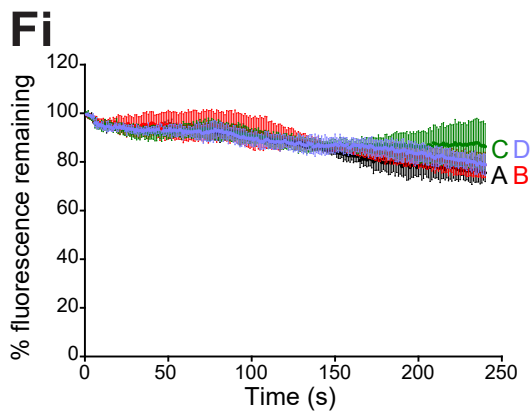

**Fii**

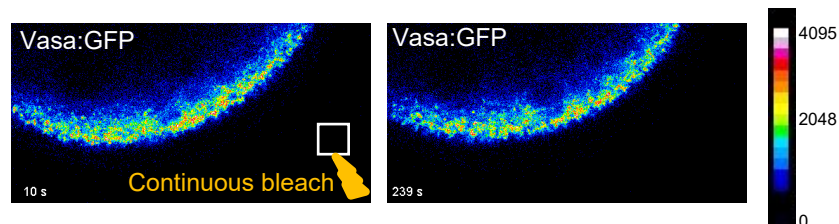

**Figure 1 - figure supplement 1**

Supplement: supp [file elife-37949-supp-v1.zip]

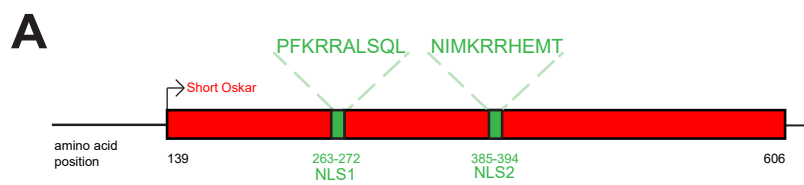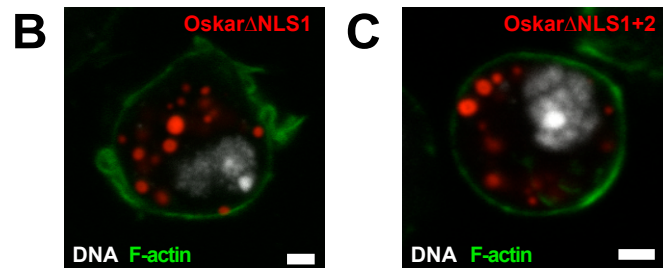

**Figure 6 - figure supplement 1**

Supplement: supp [file elife-37949-supp-v1.zip]

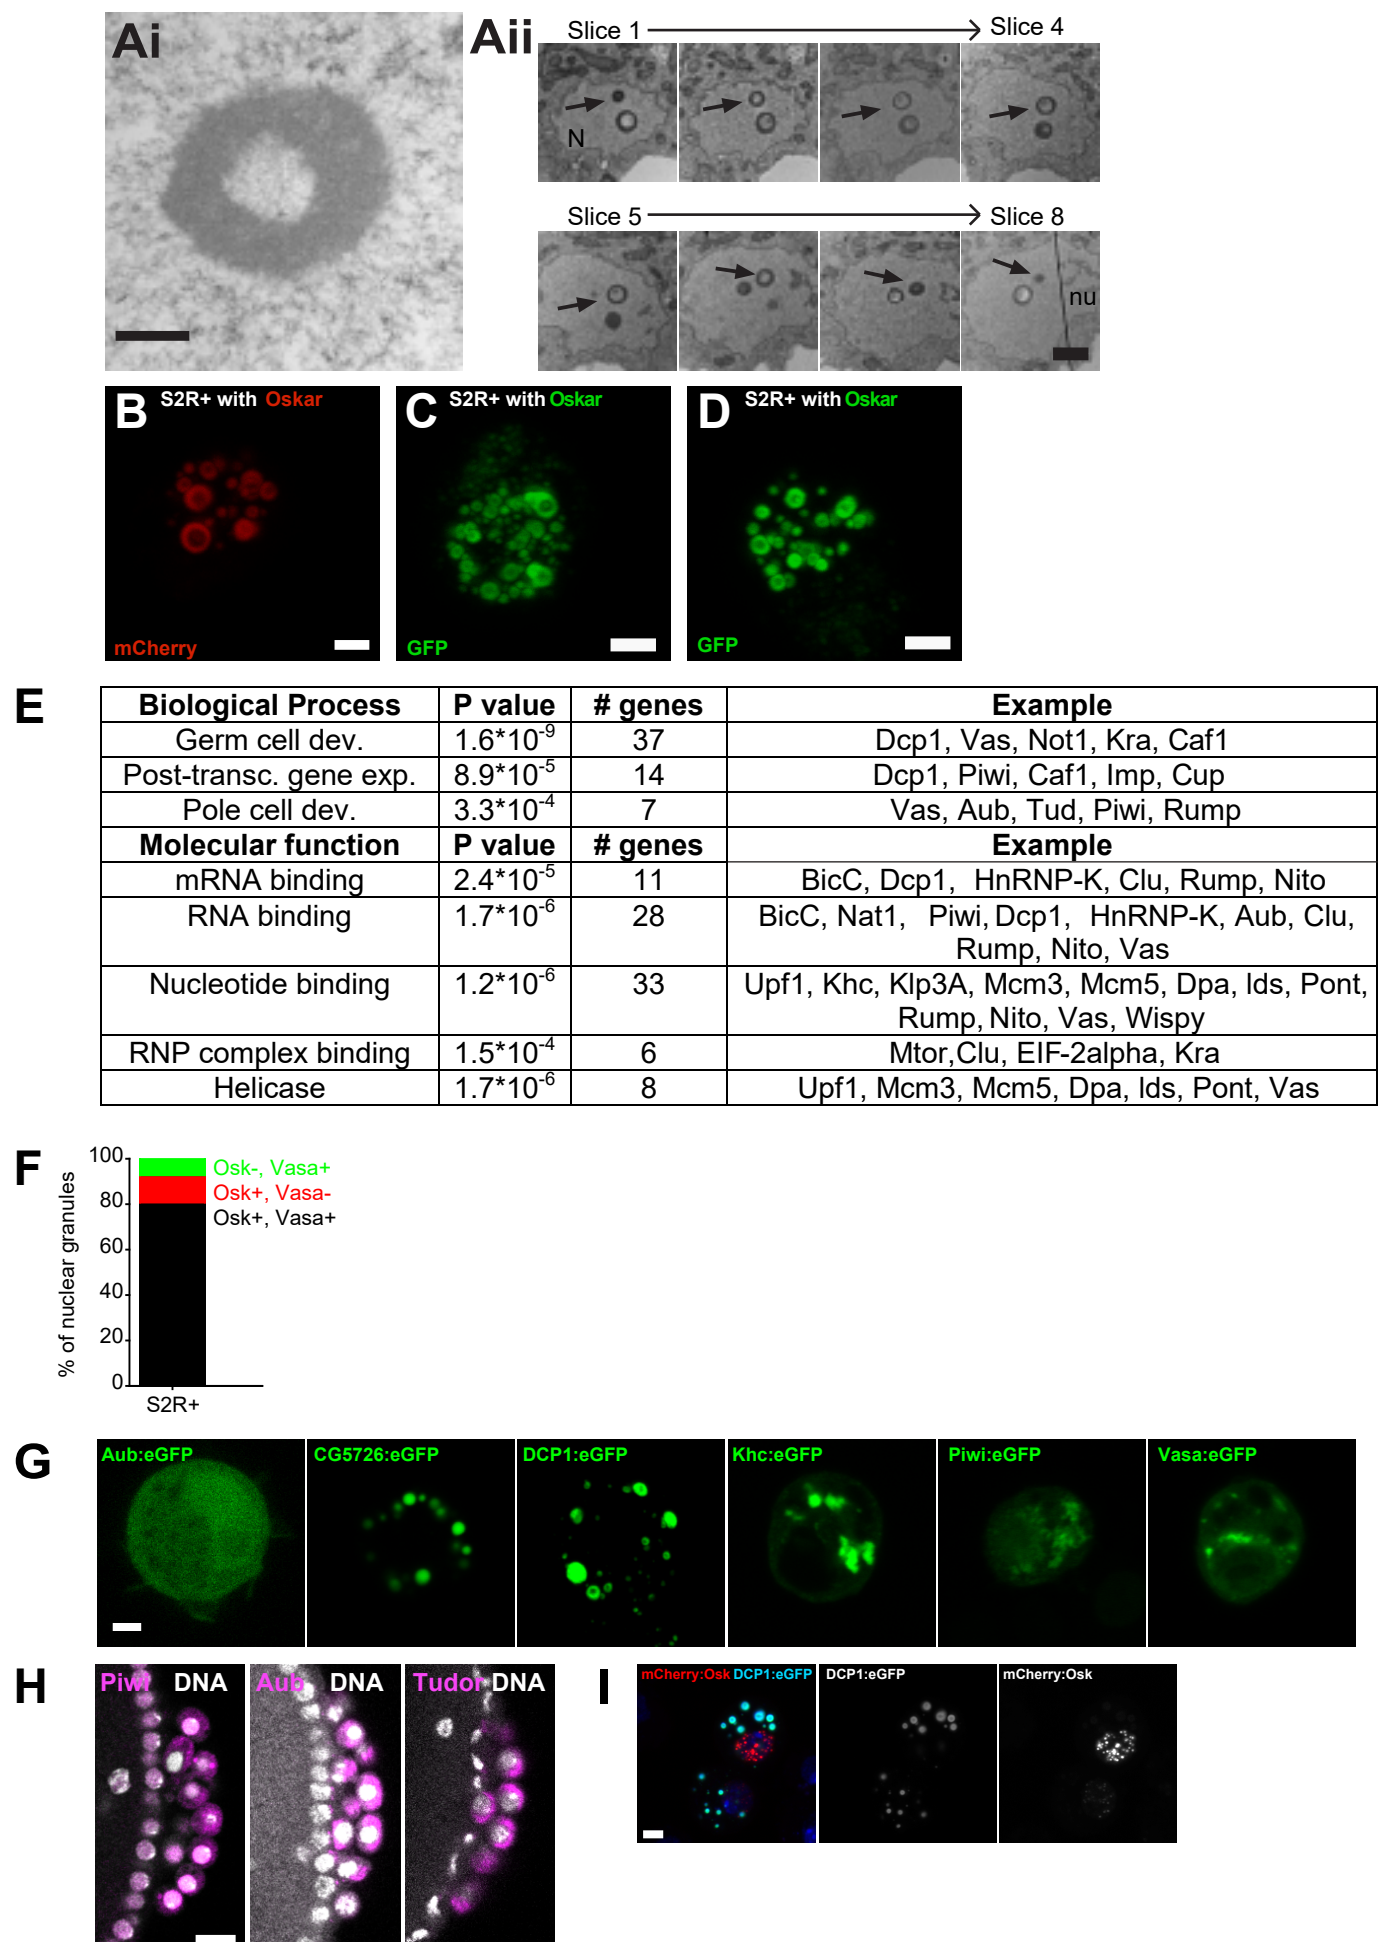

**Figure 3 - figure supplement 1**

Supplement: supp [file elife-37949-supp-v1.zip]

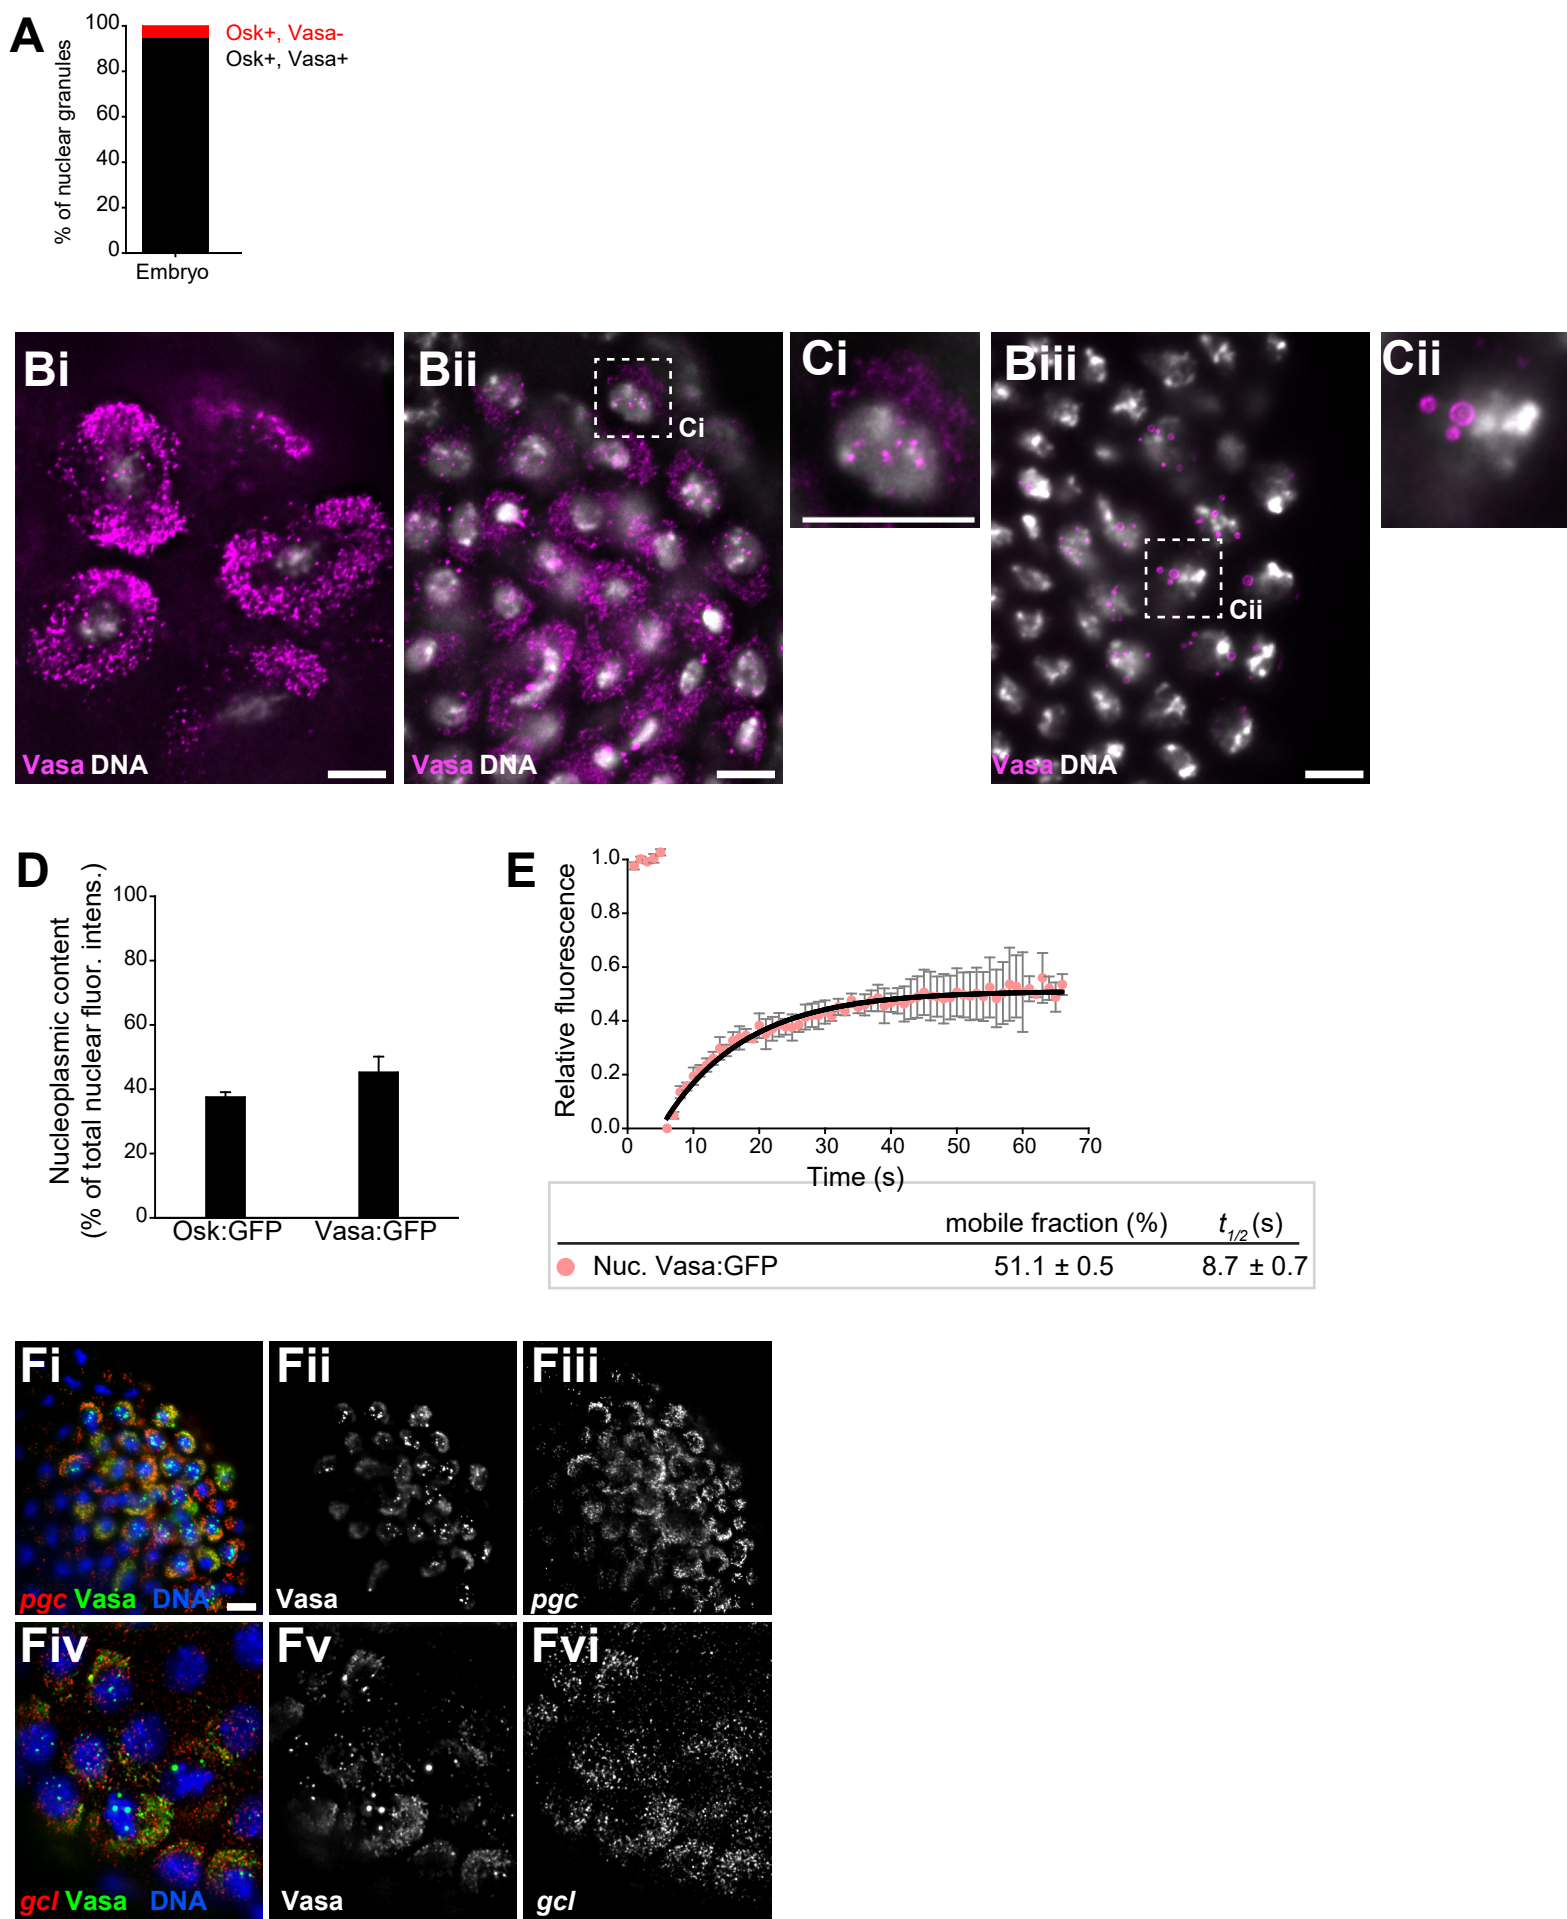

Figure 2 - figure supplement 1

Supplement: supp [file elife-37949-supp-v1.zip]

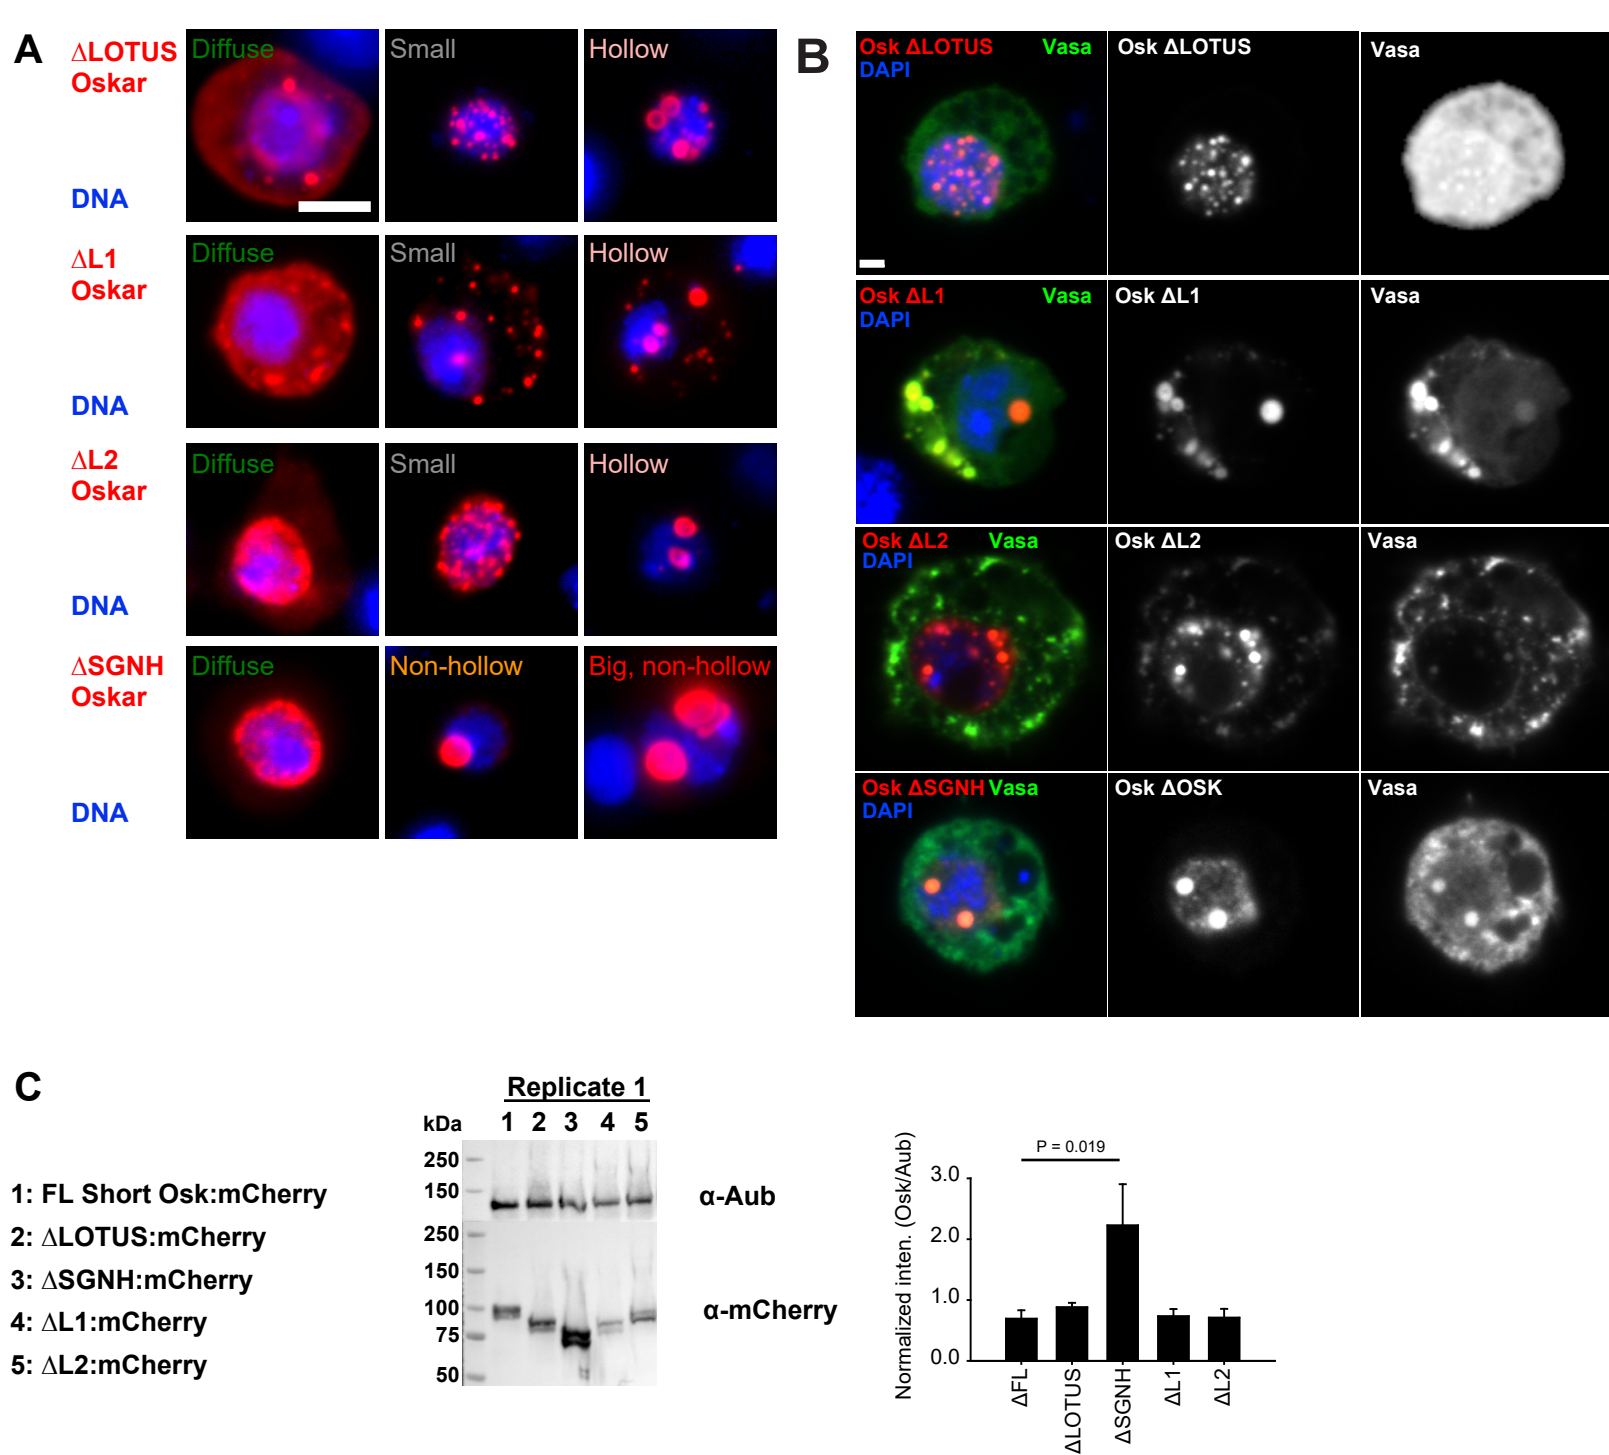

**Figure 5 - figure supplement 1**

Supplement: supp [file elife-37949-supp-v1.zip]
